# Supplementary material
Source: PubMed Central journal article supplement (PMC6880776)
Supplement: om9b00610_si_001.pdf [file om9b00610_si_001.pdf]

# Supporting Information

## Probing the hydrogenation of vinyl sulfoxides using *para*-hydrogen

Ben. J. Tickner,<sup>a</sup> Rachel R. Parker,<sup>b</sup> Adrian C. Whitwood<sup>b</sup> and Simon B. Duckett<sup>a\*</sup>

<sup>a</sup>Center for Hyperpolarisation in Magnetic Resonance (CHyM), University of York, Heslington, York, YO10 5NY, UK

<sup>b</sup>Department of Chemistry, University of York, Heslington, York, YO10 5DD, UK

\*Corresponding Author: [simon.duckett@york.ac.uk](mailto:simon.duckett@york.ac.uk)

# Table of Contents

## S1. General remarks

## S2. Characterization of products

S2.1. Characterization of phenylvinyl sulfoxide, A

S2.2. Characterization of phenylethyl sulfoxide, B

S2.3: Characterization of  $[\text{IrCl}(\text{H})_2(\text{dibenzyl sulfoxide})_2(\text{IMes})]$ , 3

S2.4: Characterization of  $[\text{Ir}_2(\text{H})_3(\kappa^2\text{-H})(\kappa^2\text{-SPh})_2(\text{IMes})_2(\text{S}(\text{O})(\text{Et})(\text{Ph}))]$ , 4 and  $[\text{Ir}_2(\text{H})_4(\kappa^2\text{-S})(\text{IMes})_2(\text{S}(\text{O})(\text{CH}_2\text{Ph})_2)_2]$ , 5

## S3. Monitoring formation of products

S3.1. Formation of phenylethylsulfoxide, B

S3.2. Formation of  $[\text{IrCl}(\text{H})_2(\text{C})_2(\text{IMes})]$ , 3

## S4. References

## S1. General remarks

All NMR measurements were carried out on a 400 MHz Bruker Avance III spectrometer at 298 K unless otherwise stated. *Para*-hydrogen ( $p\text{-H}_2$ ) was produced by passing hydrogen gas over a spin-exchange catalyst ( $\text{Fe}_2\text{O}_3$ ) at 28 K and used for all hyperpolarization experiments. This method produces constant  $p\text{-H}_2$  with ca. 93% purity.  $^1\text{H}$  (400 MHz) and  $^{13}\text{C}$  (100.6 MHz) NMR spectra were recorded with an internal deuterium lock. Chemical shifts are quoted as parts per million and referenced to methanol.  $^{13}\text{C}$  NMR spectra were recorded with broadband proton decoupling. Coupling constants ( $J$ ) are quoted in Hertz. All starting compounds were purchased from Sigma Aldrich, Fluorochem or Alfa-Aesar and used as supplied without further purification.

The shake & drop method was employed for recording hyperpolarized SABRE NMR spectra.<sup>1</sup> Samples were prepared in a 5 mm NMR tube that was fitted with a J. Young's tap. The iridium precatalyst used was  $[\text{IrCl}(\text{COD})(\text{IMes})]$  (where IMes = 1,3-bis(2,4,6-trimethyl-phenyl)imidazole-2-ylidene and COD = *cis,cis*-1,5-cyclooctadiene) and was synthesized in our laboratory according to a literature procedure.<sup>2</sup> The NMR samples were subsequently degassed by two freeze-pump-thaw cycles before filling the tube with  $p\text{-H}_2$  at 3 bar pressure. Once filled with  $p\text{-H}_2$ , the NMR tubes were shaken vigorously for 10 seconds in the 65 Gauss fringe field of a 9.4 T Bruker spectrometer. Immediately after that, the NMR tubes were put inside the spectrometer for NMR detection.

## S2. Characterization of products

### S2.1. Characterization of phenylvinyl sulfoxide, A

A sample containing 0.1 mL phenylvinylsulfoxide, A, and 0.5 mL methanol- $d_4$  was characterized using NMR spectroscopy at 298 K.

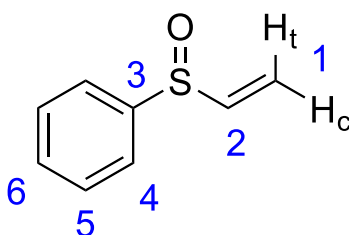

Figure S1: Structure of the starting phenylvinylsulfoxide, A, where the labels refer to the resonance numbers of Table S1.

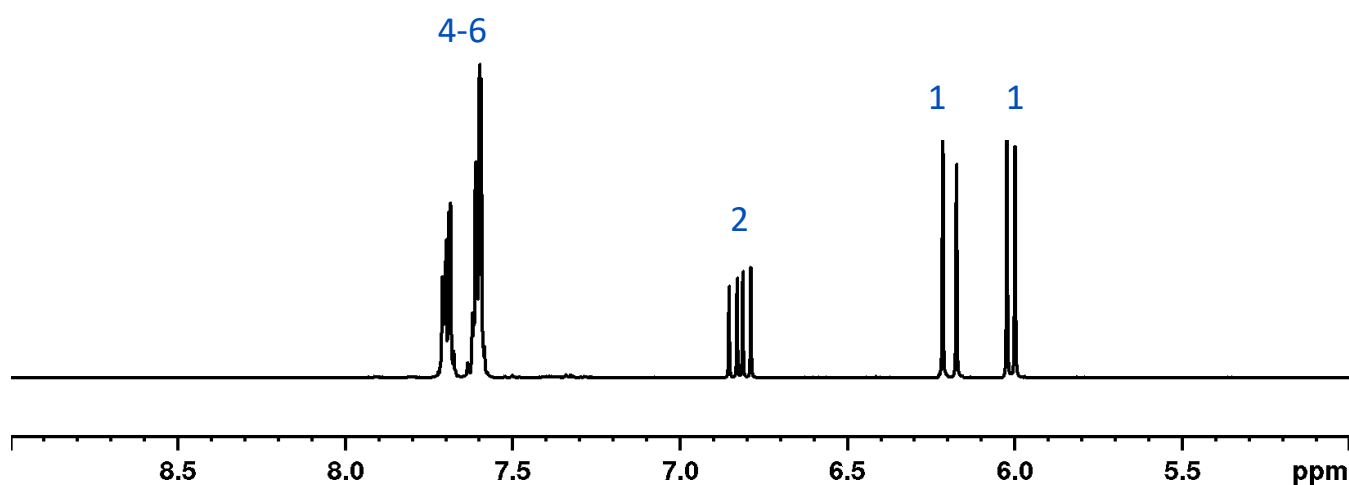

Figure S2: Partial  $^1\text{H}$  NMR spectrum of a solution containing 0.1 mL phenylvinylsulfoxide and 0.5 mL methanol- $d_4$  at 298 K where the labels reflect the resonances shown in Figure S1.

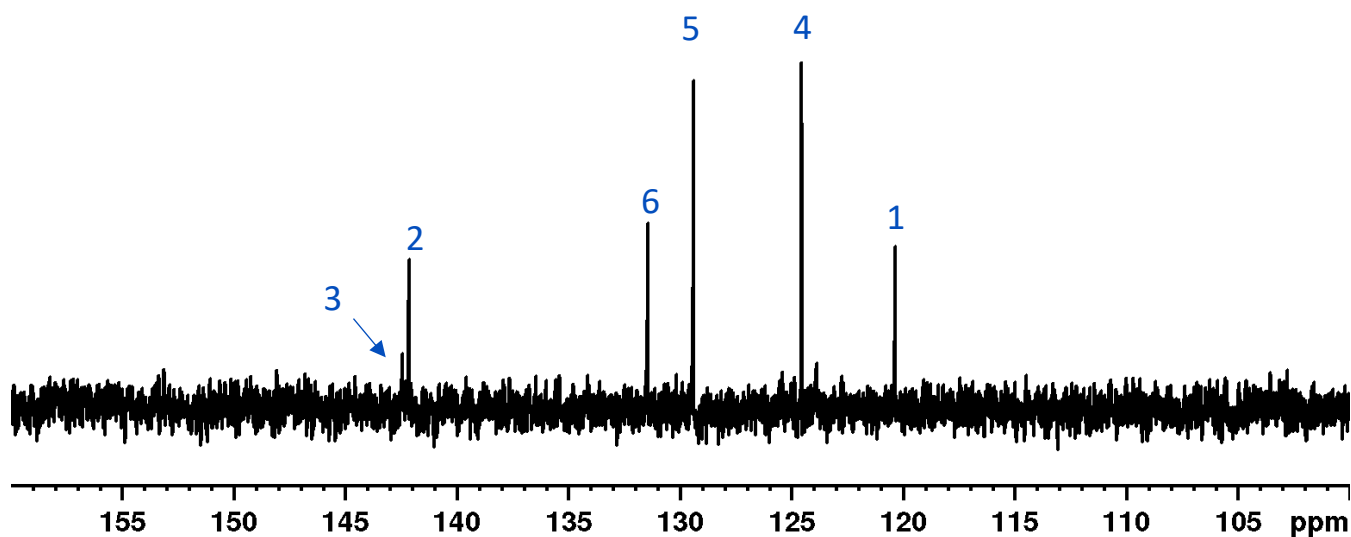

Figure S3: Partial  $^{13}\text{C}$  NMR spectrum of a solution containing 0.1 mL phenylvinylsulfoxide and 0.5 mL methanol- $d_4$  at 298 K where the labels reflect the resonances shown in Figure S1.

Table S1: NMR characterisation data of the starting phenylvinylsulfoxide, **A**, of Figure S1 at 298 K.

| Resonance | $^1\text{H}$                                                                                                    | $^{13}\text{C}$ |
|-----------|-----------------------------------------------------------------------------------------------------------------|-----------------|
| 1         | $^1\text{H}_t$ 6.18 d ( $^3J_{\text{trans}} = 16.5$ Hz)<br>$^1\text{H}_c$ 5.97 d ( $^3J_{\text{cis}} = 9.5$ Hz) | 120.43          |
| 2         | 6.79 dd ( $^3J_{\text{trans}} = 16.5$ Hz, $^3J_{\text{cis}} = 9.5$ Hz)                                          | 142.31          |
| 3         | -                                                                                                               | 142.61          |
| 4         | 7.5-7.6 (overlap)                                                                                               | 124.61          |
| 5         | 7.5-7.6 (overlap)                                                                                               | 129.50          |
| 6         | 7.5-7.6 (overlap)                                                                                               | 131.49          |

## S2.2. Characterization of phenylethyl sulfoxide, **B**

A sample containing 2 mg  $[\text{IrCl}(\text{COD})(\text{IMes})]$  and 2  $\mu\text{L}$  phenylvinylsulfoxide, **A**, in 0.6 mL methanol- $d_4$  were hydrogenated with 3 bar  $\text{H}_2$  for 800 minutes at 298 K. The resultant solution was characterized using NMR spectroscopy at 298 K. An aliquot of this 0.6 mL NMR tube solution was taken for mass spectral analysis. Electrospray high resolution mass spectra were recorded on a Bruker Daltonics microOTOF spectrometer. The presence of the phenylethyl sulfoxide was confirmed.

$[\text{C}_8\text{H}_{10}\text{OS} + \text{H}]^+$  calc. 155.0531 found 155.0522

$[\text{C}_8\text{H}_{10}\text{OS} + \text{Na}]^+$  calc. 177.0350 found 177.0343

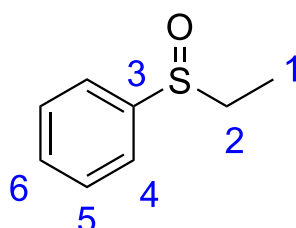

Figure S4: Structure of the hydrogenated product phenylethylsulfoxide, **B** where the labels refer to the resonance numbers of Table S2.

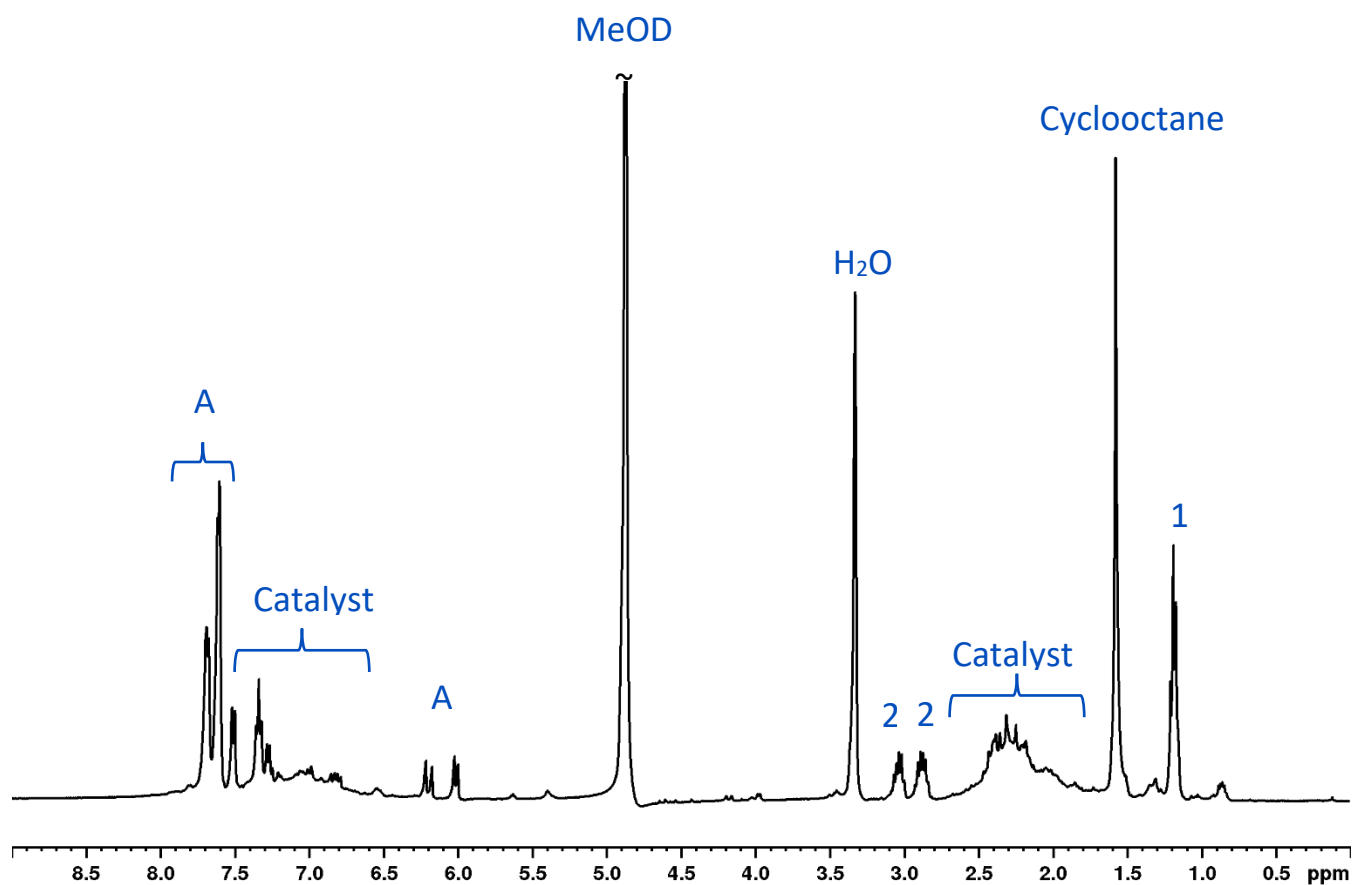

Figure S5: Partial  $^1\text{H}$  NMR spectrum after a solution containing 2 mg  $[\text{IrCl}(\text{COD})(\text{IMes})]$  and 2  $\mu\text{L}$  phenylvinylsulfoxide, **A**, in 0.6 mL methanol- $d_4$  were hydrogenated with 3 bar  $\text{H}_2$  for 800 minutes at 298 K where the numerical labels reflect the resonances shown in Figure S4.

Table S2: NMR characterisation data of the hydrogenated product phenylethylsulfoxide, **B** of Figure S2 at 298 K.

| Resonance | $^1\text{H}$           | $^{13}\text{C}$ |
|-----------|------------------------|-----------------|
| 1         | 1.19 t ( $^3J = 7$ Hz) | 4.79            |
| 2         | 2.89 (m), 3.09 (m)     | 49.6            |
| 3         | -                      | 141.66          |
| 4         | 7.71                   | 123.73          |
| 5         | 7.64 (overlap)         | 129.17          |
| 6         | 7.64 (overlap)         | 131.18          |

### S2.3: Characterization of $[\text{IrCl}(\text{H})_2(\text{C}_2(\text{IMes}))_2]$ , **3**

A sample containing 2 mg  $[\text{IrCl}(\text{COD})(\text{IMes})]$  and 4 eq. dibenzyl sulfoxide, **C** in 0.6 mL methanol- $d_4$  were left under 3 bar  $\text{H}_2$  for 1 hour at 298 K before 2D NMR characterization was performed at 245 K. An aliquot of this 0.6 mL NMR tube solution was taken for mass spectral analysis.

$[\text{C}_{14}\text{H}_{14}\text{NaOS} + \text{Na}]^+$  calc. 253.0663 found 253.0656 (**C**)

$[\text{C}_{49}\text{H}_{54}\text{ClIrN}_2\text{O}_2\text{S}_2 - \text{C}_{14}\text{H}_{16}\text{ClOS}]^+$  calc. 727.2334 found 727.2338 (**3** fragment)

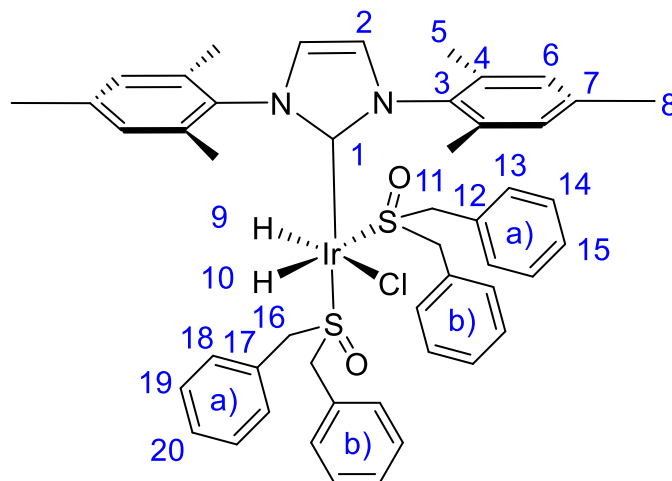

Figure S6: Structure of  $[\text{IrCl}(\text{H})_2(\text{C})_2(\text{IMes})]$ , **3** where the labels refer to the resonance numbers of Table S3.

Table S3: NMR characterisation data of  $[\text{IrCl}(\text{H})_2(\text{C})_2(\text{IMes})]$ , **3** of Figure S3 at 245 K.

| Resonance | $^1\text{H}$                                                                          | $^{13}\text{C}$              |
|-----------|---------------------------------------------------------------------------------------|------------------------------|
| 1         | -                                                                                     | -                            |
| 2         | ~ 7 (overlap)                                                                         | ~ 128 (overlap)              |
| 3         | -                                                                                     | ~ 135 (overlap)              |
| 4         | -                                                                                     | 135.45                       |
| 5         | 2.21                                                                                  | 17.89                        |
| 6         | 7.06                                                                                  | ~ 128 (overlap)              |
| 7         | -                                                                                     | 131.40                       |
| 8         | 2.42                                                                                  | 20.16                        |
| 9         | -15.78 ( $^2J_{\text{HH}} = 6$ Hz)                                                    | -                            |
| 10        | -20.89 ( $^2J_{\text{HH}} = 6$ Hz)                                                    | -                            |
| 11        | a) 2.47, 3.13 ( $^2J_{\text{HH}} = 14$ Hz) b) 3.71, 4.95 ( $^2J_{\text{HH}} = 12$ Hz) | a) 65.99 b) 64.02            |
| 12        | -                                                                                     | ~ 132 (overlap)              |
| 13        | a) 6.91 b) 6.83                                                                       | a) 131.23 b) 132.55          |
| 14        | a) 7.32 b) 7.18                                                                       | a) 128.03 b) 128.41          |
| 15        | a) 7.43 b) 7.62                                                                       | ~ 128 (overlap)              |
| 16        | a) 4.98, 5.35 ( $^2J_{\text{HH}} = 11$ Hz) b) 3.78, 5.44 ( $^2J_{\text{HH}} = 13$ Hz) | a) 61.1 b) 50.91             |
| 17        | -                                                                                     | ~ 133 (overlap)              |
| 18        | a) ~ 7 (overlap) b) 6.23                                                              | a) ~ 132 (overlap) b) 132.90 |
| 19        | a) ~ 7 (overlap) b) 6.99                                                              | a) ~ 128 (overlap) b) 126.67 |
| 20        | a) ~ 7 (overlap) b) 7.09                                                              | ~ 128 (overlap)              |

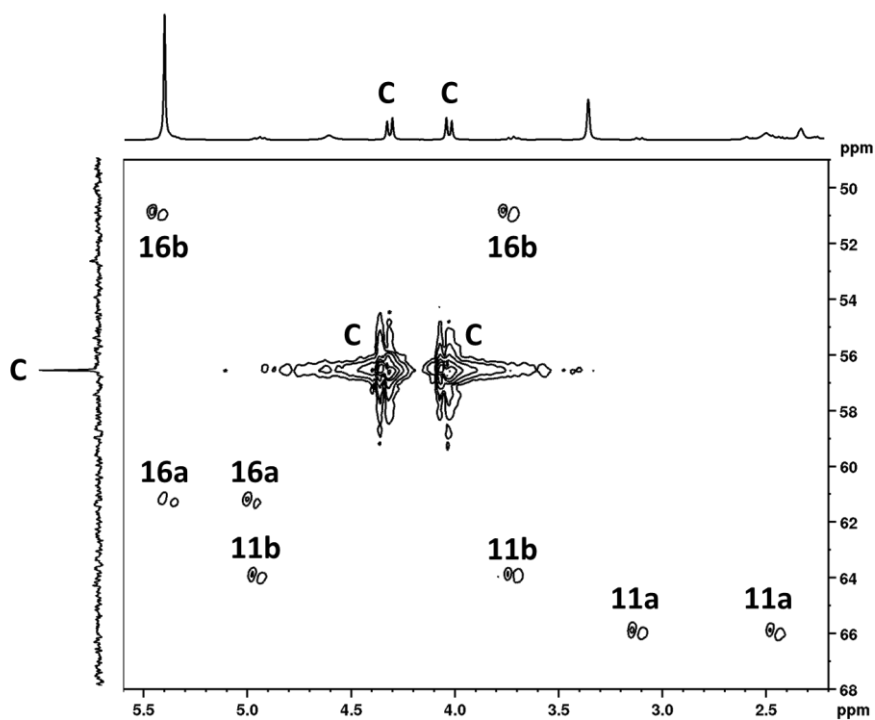

Figure S7: In a short range HMQC at 245 K  $[\text{IrCl}(\text{H})_2(\text{C})_2(\text{IMes})]$  exhibits four pairs of diastereotopic  $\text{CH}_2$  protons corresponding to the two bound C ligands.

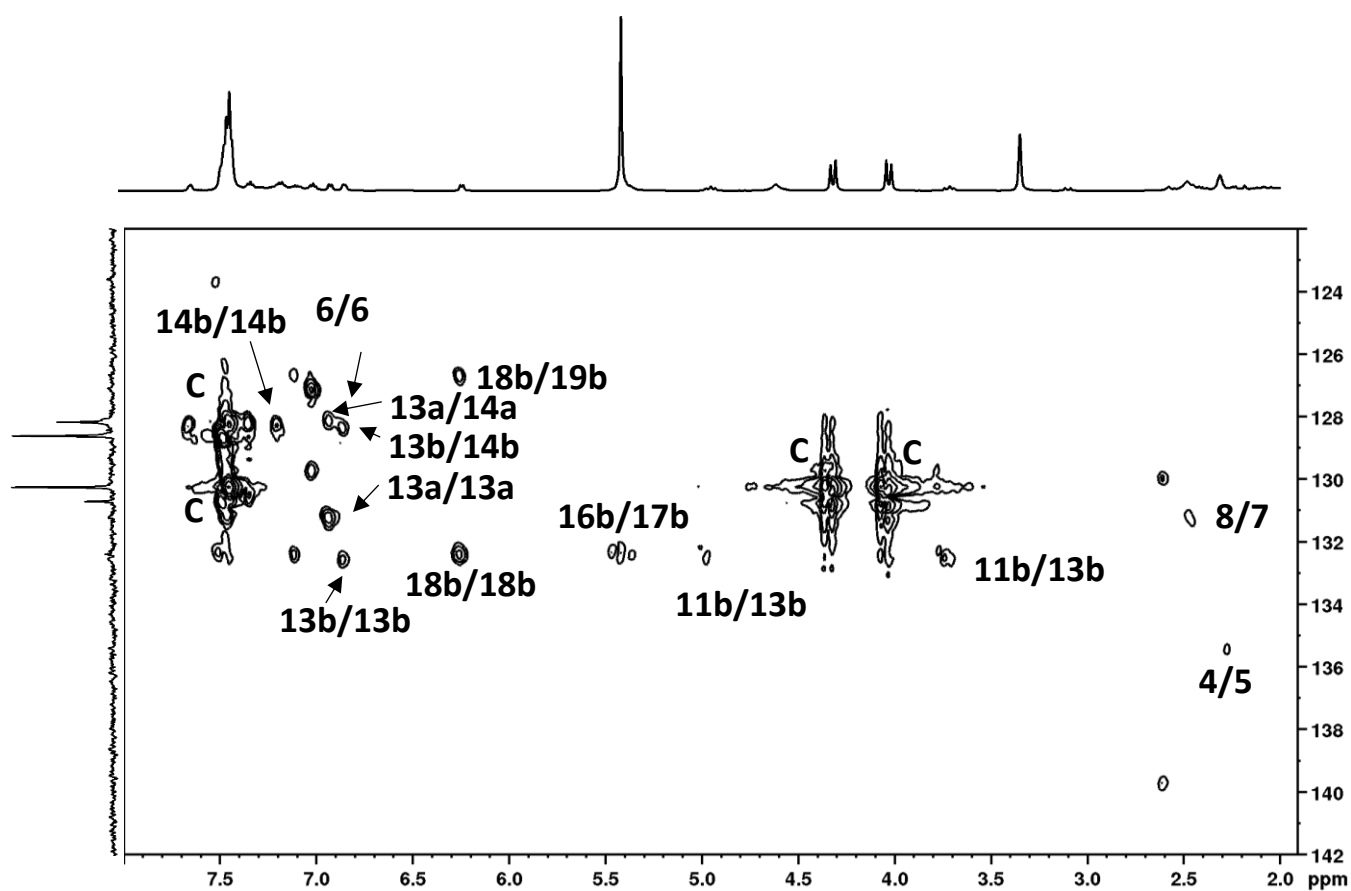

Figure S8: A partial long range  $^1\text{H}$ - $^{13}\text{C}$  HMQC at 245 K of a solution of  $[\text{IrCl}(\text{H})_2(\text{C})_2(\text{IMes})]$  in methanol- $d_4$  with ( $^1\text{H}/^{13}\text{C}$ ) resonance labels corresponding to those in Figure S6 and Table S3.

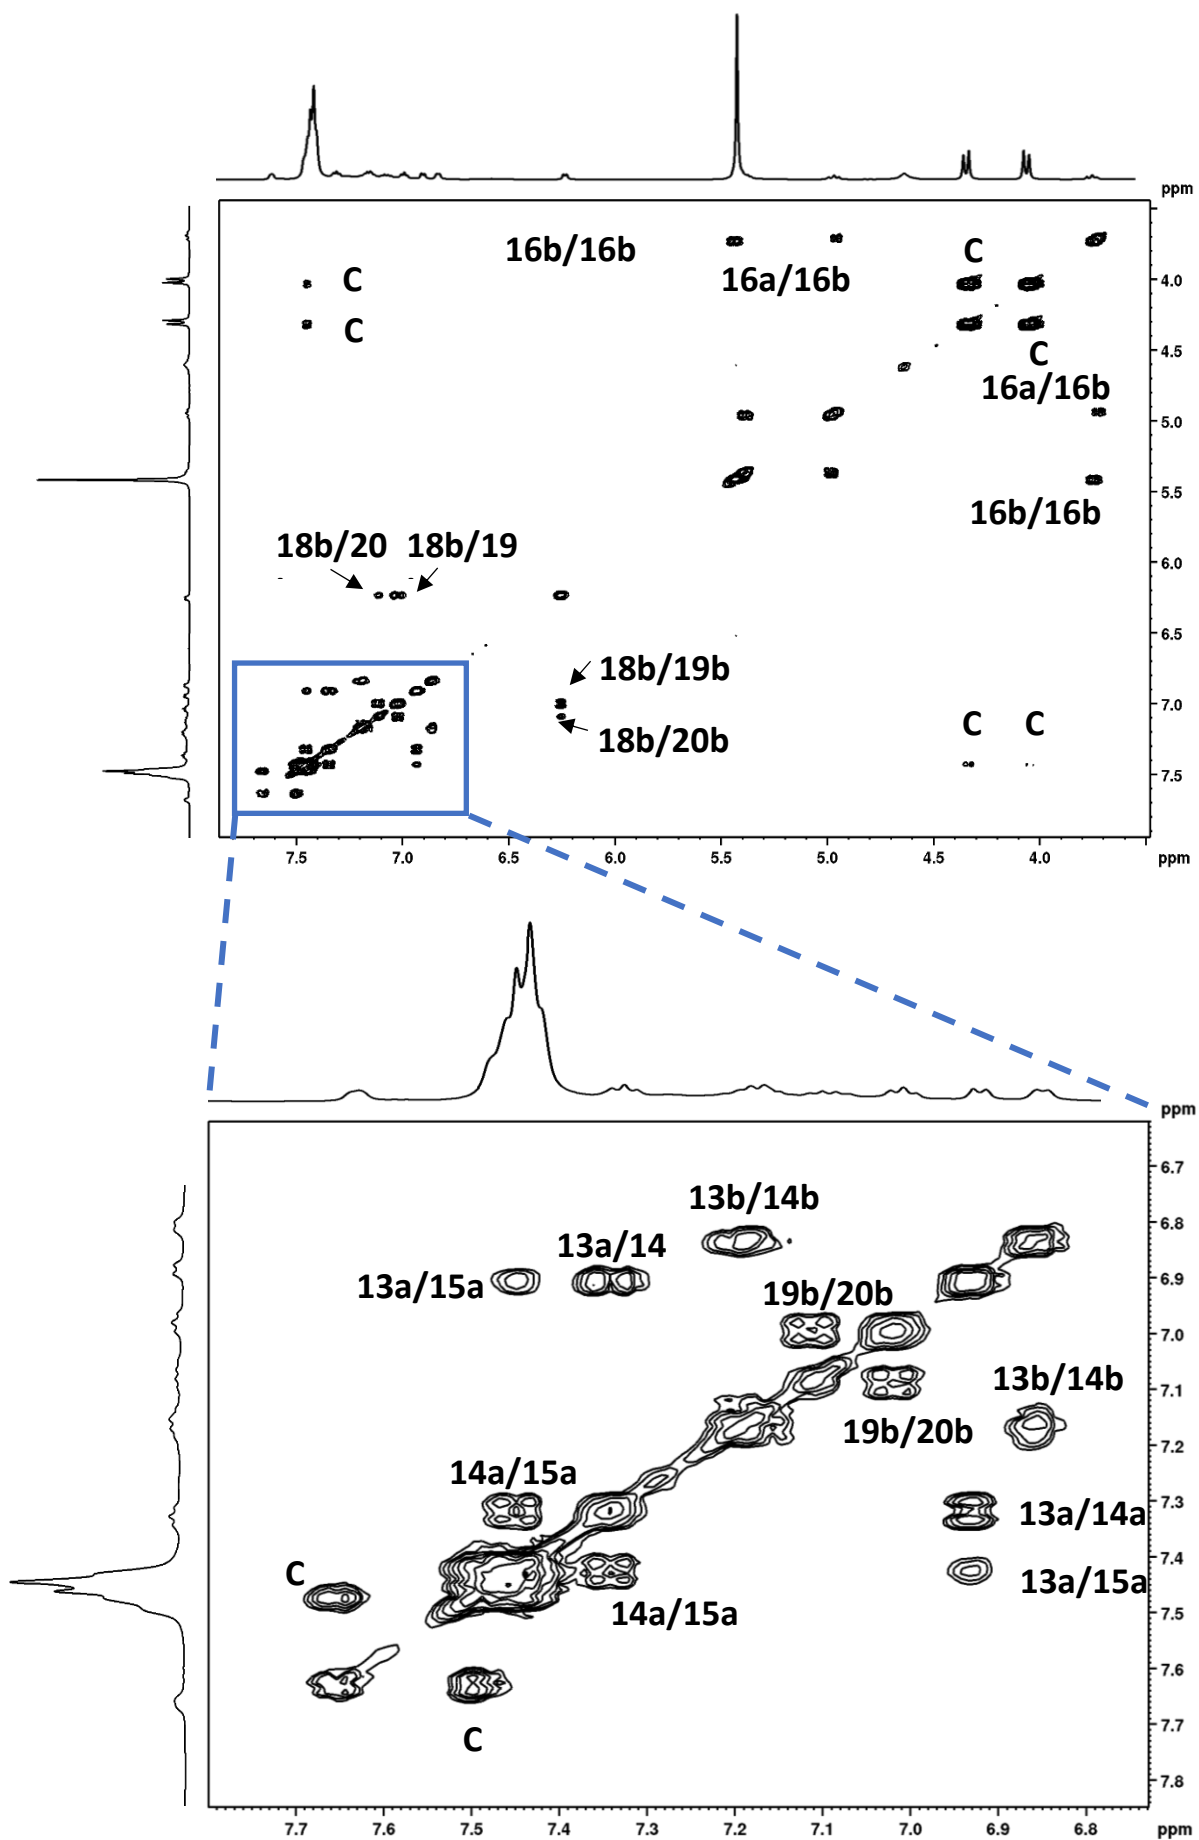

Figure S9: A partial  $^1\text{H}$ - $^1\text{H}$  COSY at 245 K of a solution of  $[\text{IrCl}(\text{H})_2(\text{C})_2(\text{IMes})]$  in methanol- $d_4$  with resonance labels corresponding to those in Figure S6 and Table S3.



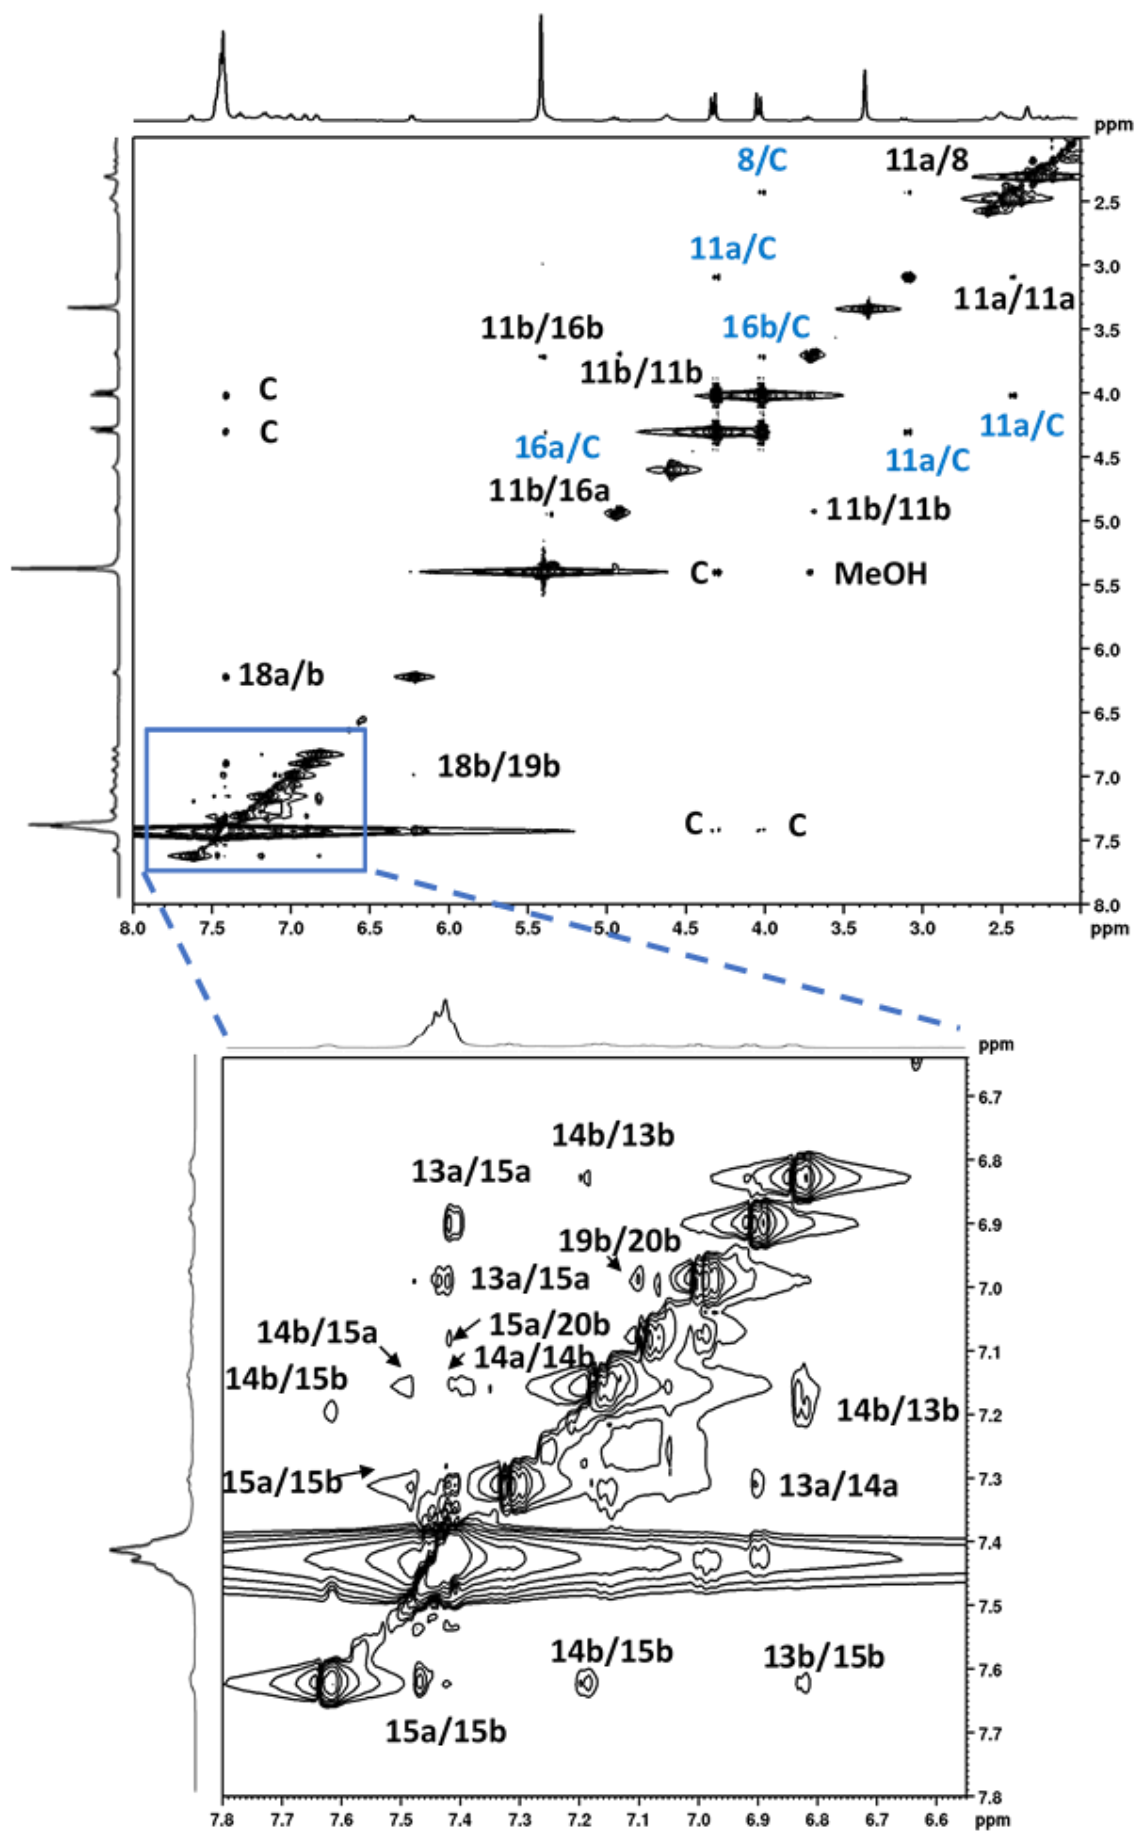

Figure S10: A partial  $^1\text{H}$ - $^1\text{H}$  NOESY at 245 K of a solution of  $[\text{IrCl}(\text{H})_2(\text{C})_2(\text{IMes})]$  in methanol- $d_4$  with resonance labels corresponding to those in Figure S6 and Table S3. Those resonance labels in blue reflect exchange peaks while those in black reflect NOE interactions.

## S2.4: Characterization of $[\text{Ir}_2(\text{H})_3(\kappa^2\text{-H})(\kappa^2\text{-SPh})_2(\text{IMes})_2(\text{S}(\text{O})(\text{Et})(\text{Ph}))]$ , **4** and $[\text{Ir}_2(\text{H})_4(\kappa^2\text{-S})(\text{IMes})_2(\text{S}(\text{O})(\text{CH}_2\text{Ph})_2)_2]$ , **5**

$[\text{Ir}_2(\text{H})_3(\kappa^2\text{-H})(\kappa^2\text{-SPh})_2(\text{IMes})_2(\text{S}(\text{O})(\text{Et})(\text{Ph}))]$ , **4** and  $[\text{Ir}_2(\text{H})_4(\kappa^2\text{-S})(\text{IMes})_2(\text{S}(\text{O})(\text{CH}_2\text{Ph})_2)_2]$ , **5** were prepared by leaving a solution of  $[\text{IrCl}(\text{COD})(\text{IMes})]$  (5 mM), sodium-1,2-pyruvate- $^{13}\text{C}_2$  (5 eq.) and phenylvinylsulfoxide (4 eq.) with 3-bar  $\text{H}_2$  in methanol- $d_4$  at 278 K for a period of several weeks.

For X-ray diffraction studies, a suitable crystal was selected and mounted on an Oxford Diffraction SuperNova- X-ray diffractometer. The crystal was kept at 110 K during data collection. Diffractometer control, data collection, initial unit cell determination, frame integration and unit-cell refinement was carried out with "CrysAlisPro".<sup>3</sup> Face-indexed absorption corrections were applied using spherical harmonics, implemented in SCALE3 ABSPACK scaling algorithm. Using Olex2,<sup>4</sup> the structure was solved with the ShelXT<sup>5</sup> structure solution program using Intrinsic Phasing and refined with the ShelXL<sup>6</sup> refinement package using Least Squares minimisation.

Table S4: Crystal data and structure refinement for the crystal structure of  $[\text{Ir}_2(\text{H})_3(\kappa^2\text{-H})(\kappa^2\text{-SPh})_2(\text{IMes})_2(\text{S}(\text{O})(\text{Et})(\text{Ph}))]$ , **4** and  $[\text{Ir}_2(\text{H})_4(\kappa^2\text{-S})(\text{IMes})_2(\text{S}(\text{O})(\text{CH}_2\text{Ph})_2)_2]$ , **5**.

| Compound                                       | $[\text{Ir}_2(\text{H})_3(\kappa^2\text{-H})(\kappa^2\text{-SPh})_2(\text{IMes})_2(\text{S}(\text{O})(\text{Et})(\text{Ph}))]$ | $[\text{Ir}_2(\text{H})_4(\kappa^2\text{-S})(\text{IMes})_2(\text{S}(\text{O})(\text{CH}_2\text{Ph})_2)_2]$ |
|------------------------------------------------|--------------------------------------------------------------------------------------------------------------------------------|-------------------------------------------------------------------------------------------------------------|
| Empirical formula                              | $\text{C}_{63}\text{H}_{76}\text{Ir}_2\text{N}_4\text{O}_2\text{S}_3$                                                          | $\text{C}_{70}\text{H}_{80}\text{Ir}_2\text{N}_4\text{O}_2\text{S}_3$                                       |
| Formula weight                                 | 1401.85                                                                                                                        | 1489.96                                                                                                     |
| Temperature/K                                  | 110.05(10)                                                                                                                     | 110.10(14)                                                                                                  |
| Crystal system                                 | triclinic                                                                                                                      | monoclinic                                                                                                  |
| Space group                                    | P-1                                                                                                                            | $P2_1/c$                                                                                                    |
| a/Å                                            | 11.9397(4)                                                                                                                     | 19.8526(2)                                                                                                  |
| b/Å                                            | 12.7147(4)                                                                                                                     | 15.10020(10)                                                                                                |
| c/Å                                            | 20.2094(6)                                                                                                                     | 21.9966(2)                                                                                                  |
| $\alpha/^\circ$                                | 91.573(3)                                                                                                                      | 90                                                                                                          |
| $\beta/^\circ$                                 | 92.120(3)                                                                                                                      | 105.3940(10)                                                                                                |
| $\gamma/^\circ$                                | 101.839(3)                                                                                                                     | 90                                                                                                          |
| Volume/Å <sup>3</sup>                          | 2998.74(16)                                                                                                                    | 6357.53(10)                                                                                                 |
| Z                                              | 2                                                                                                                              | 4                                                                                                           |
| $\rho_{\text{calc}}/\text{g}/\text{cm}^3$      | 1.553                                                                                                                          | 1.557                                                                                                       |
| $\mu/\text{mm}^{-1}$                           | 4.583                                                                                                                          | 4.328                                                                                                       |
| F(000)                                         | 1400.0                                                                                                                         | 2984.0                                                                                                      |
| Crystal size/mm <sup>3</sup>                   | 0.147 × 0.125 × 0.067                                                                                                          | 0.199 × 0.165 × 0.121                                                                                       |
| Radiation                                      | MoK $\alpha$ ( $\lambda = 0.71073$ )                                                                                           | MoK $\alpha$ ( $\lambda = 0.71073$ )                                                                        |
| 2 $\theta$ range for data collection/ $^\circ$ | 6.758 to 56.55                                                                                                                 | 6.64 to 52.744                                                                                              |
| Index ranges                                   | -15 ≤ h ≤ 14, -16 ≤ k ≤ 16, -26 ≤ l ≤ 26                                                                                       | -14 ≤ h ≤ 24, -17 ≤ k ≤ 18, -27 ≤ l ≤ 21                                                                    |
| Reflections collected                          | 24647                                                                                                                          | 26164                                                                                                       |
| Independent reflections                        | 13472 [ $R_{\text{int}} = 0.0297$ , $R_{\text{sigma}} = 0.0517$ ]                                                              | 12962 [ $R_{\text{int}} = 0.0259$ , $R_{\text{sigma}} = 0.0408$ ]                                           |
| Data/restraints/parameters                     | 13472/7/719                                                                                                                    | 12962/0/758                                                                                                 |
| Goodness-of-fit on F <sup>2</sup>              | 1.102                                                                                                                          | 1.059                                                                                                       |
| Final R indexes [ $l > 2\sigma(l)$ ]           | $R_1 = 0.0368$ , $wR_2 = 0.0786$                                                                                               | $R_1 = 0.0260$ , $wR_2 = 0.0535$                                                                            |
| Final R indexes [all data]                     | $R_1 = 0.0512$ , $wR_2 = 0.0861$                                                                                               | $R_1 = 0.0353$ , $wR_2 = 0.0576$                                                                            |
| Largest diff. peak/hole / e Å <sup>-3</sup>    | 2.44/-1.41                                                                                                                     | 1.15/-0.94                                                                                                  |

For characterisation by NMR a sample of  $[\text{Ir}_2(\text{H})_4(\kappa^2\text{-S})(\text{IMes})_2(\text{S}(\text{O})(\text{CH}_2\text{Ph})_2)_2]$ , **5** was prepared by leaving a solution of  $[\text{IrCl}(\text{COD})(\text{IMes})]$  (5 mM), sodium-1,2-pyruvate- $^{13}\text{C}_2$  (5 eq.) and phenylvinylsulfoxide (4 eq.) with 3-bar  $\text{H}_2$  in methanol- $d_4$  at 278 K for a period of several weeks. The solid precipitate that formed was redissolved in DCM- $d_2$  and a  $^1\text{H}$  NMR spectrum was recorded at 245 K. The hydride region of these spectra showed the presence of **3** at  $\delta = 15.68$  and  $\delta = 22.38$  in addition to a hydride resonance at  $\delta = 18.49$  which is expected to correspond to **5**. **3** and **5** are present in a 8:1 ratio which makes full 2D NMR characterisation of **5** challenging due to its low concentration, peak overlap and the inability to separate them in this mixture. Unfortunately, we were unable to observe NOE peaks from the hydride resonance of **5** to other sites.

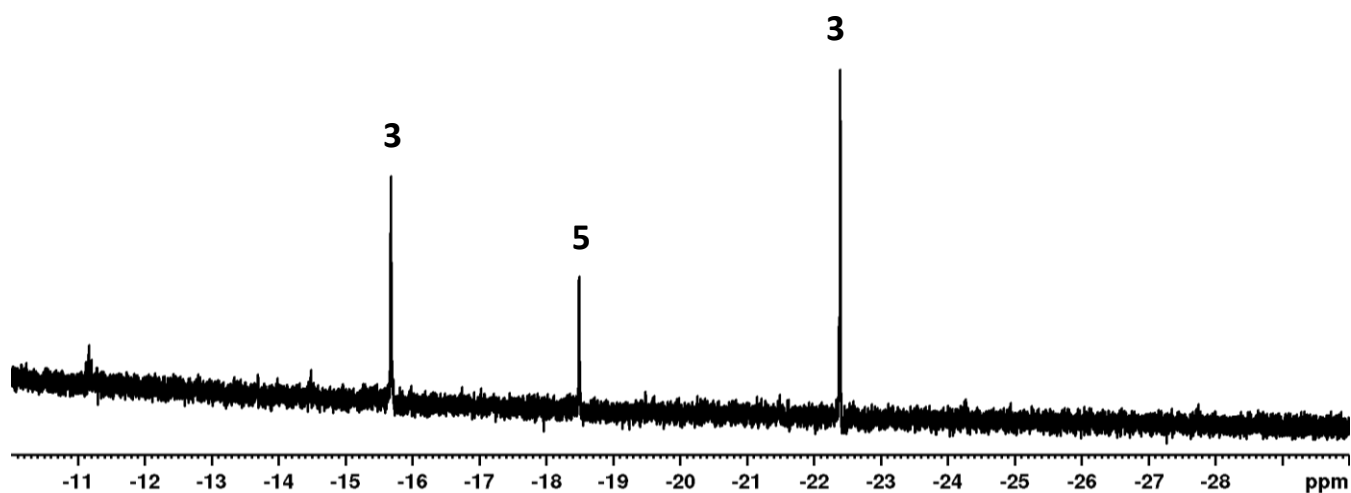

Figure S11: A partial  $^1\text{H}$  NMR spectra recorded at 245 K after a solid precipitate of **3** and **5** were dissolved in  $\text{DCM-d}_2$ .

For analysis by high resolution mass spectrometry, a solid sample containing  $[\text{Ir}_2(\text{H})_3(\kappa^2\text{-H})(\kappa^2\text{-SPh})_2(\text{IMes})_2(\text{S(O)}(\text{Et})(\text{Ph}))]$ , **4** was prepared. This involved adding 3 bar  $\text{H}_2$  to a solution of  $[\text{IrCl}(\text{COD})(\text{IMes})]$  (5 mM) and 4 eq. phenylvinylsulfoxide in methanol and leaving for several days before removing the solvent.

$[\text{C}_8\text{H}_{10}\text{NaOS} + \text{Na}]^+$  calc. 177.0350 found 177.0343 (**B**)

$[\text{C}_{62}\text{H}_{72}\text{Ir}_2\text{N}_4\text{OS}_3 - \text{C}_{27}\text{H}_{35}\text{IrN}_2\text{S} + \text{Na}]^+$  calc. 781.1874 found 781.1898 (**4** fragment)

Crystals of  $[\text{Ir}_2(\text{H})_4(\kappa^2\text{-S})(\text{IMes})_2(\text{S(O)}(\text{CH}_2\text{Ph})_2)_2]$ , **5** were prepared as described above and submitted for mass spectral analysis

$[\text{C}_{70}\text{H}_{80}\text{Ir}_2\text{N}_4\text{O}_2\text{S}_3 - \text{C}_{21}\text{H}_{27}\text{N}_2\text{S}]^+$  calc. 1151.2807 found 1151.2761 (**5** fragment)

### S3. Monitoring formation of products

#### S3.1. Formation of phenylethylsulfoxide, B

The formation of phenylethylsulfoxide at 298 K was monitored by recording a series of one scan hyperpolarised  $^1\text{H}$  NMR spectra with  $90^\circ$  pulse angles after 3 bar  $\text{H}_2$  addition to a solution of 2 mM **1** (2 mg) and 4 eq. vinyl sulfoxide (1.5  $\mu\text{L}$ ) in methanol- $d_4$ .

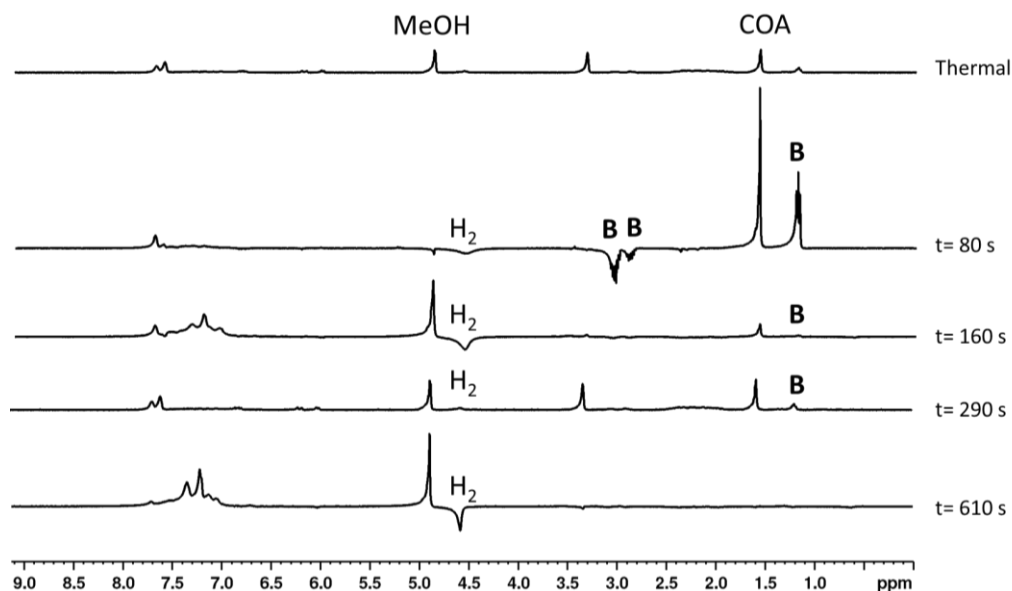

Figure S12: A series of single scan  $^1\text{H}$  NMR spectra recorded with  $90^\circ$  pulses at various times ( $t$ ) after 3 bar  $\text{H}_2$  addition to a solution of 5 mM **1** and 4 eq. **A** at 298 K. COA corresponds to cyclooctane.

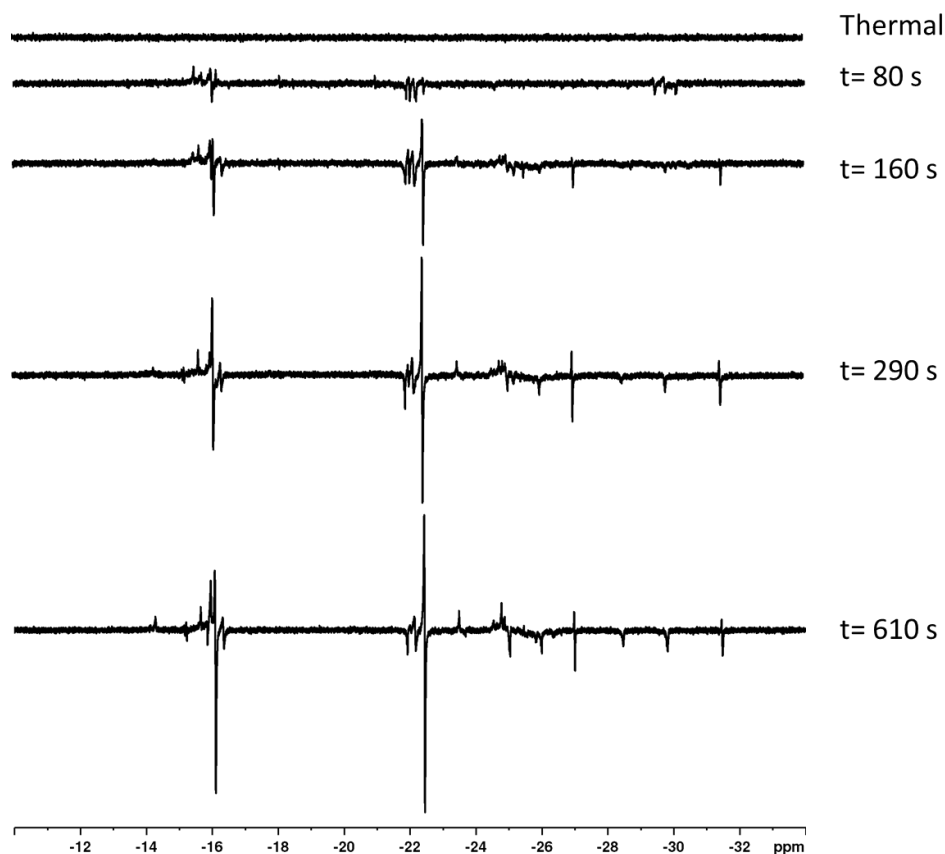

Figure S13: The hydride region of a series of single scan  $^1\text{H}$  NMR spectra recorded with  $90^\circ$  pulses at various times ( $t$ ) after 3 bar  $\text{H}_2$  addition to a solution of 5 mM **1** and 4 eq. **A** at 298 K. This plot is scaled vertically by a factor of 16 relative to Figure S12.

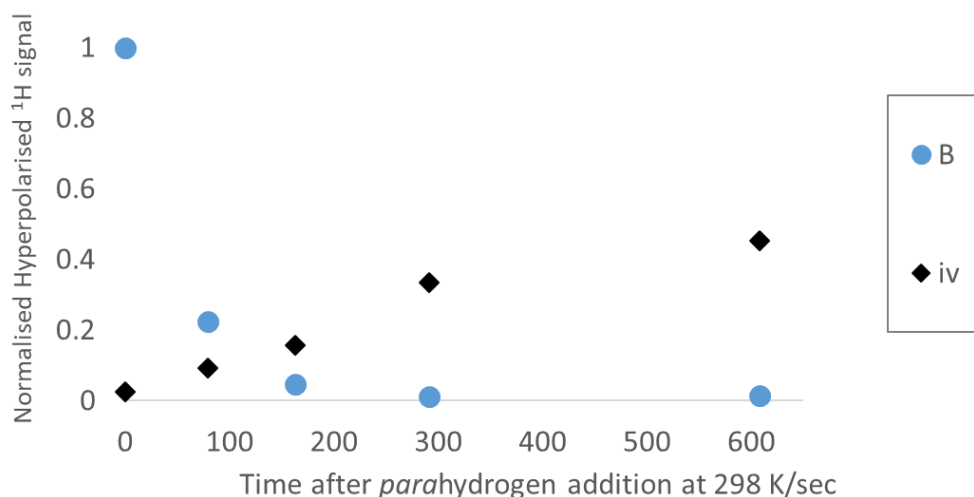

Figure S14: The evolution of the hyperpolarised signals of phenylethylsulfoxide, **B** and the major hyperpolarised hydride signal (*iv*) at  $\delta$   $-16.20$  and  $\delta$   $-12.37$  can be monitored over time at 298 K.

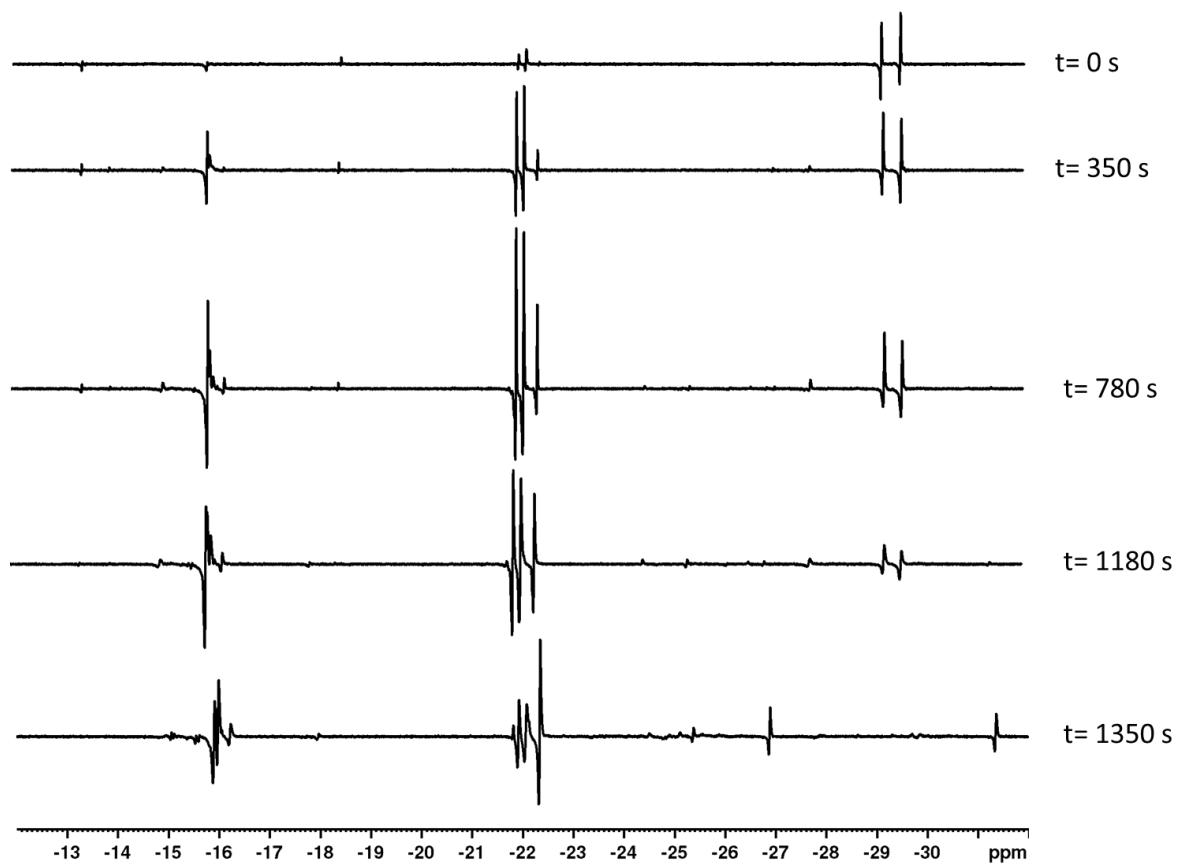

Figure S15: Hydride region of a series of single scan  $^1\text{H}$  NMR spectra recorded with  $45^\circ$  pulses at various times (*t*) after 3 bar  $\text{H}_2$  addition to a solution of 5 mM **1** and 4 eq. **A** at 263 K.

The formation of phenylethylsulfoxide at 298 K was also monitored using thermally polarised methods by recording a series of  $^1\text{H}$  NMR spectra after 3 bar  $\text{H}_2$  addition to solutions of **1** and phenylvinyl sulfoxide in 0.6 mL methanol- $d_4$ . The proportion of each species in solution was determined from diagnostic alkene resonances of phenylvinyl sulfoxide at  $\delta$  5.97,  $\delta$  6.18 and  $\delta$  6.79 and phenylethyl sulfoxide resonances at  $\delta$  1.19,  $\delta$  2.89 and  $\delta$  3.09.

These conversions have been measured under four conditions: i)  $[\text{IrCl}(\text{COD})(\text{IMes})]$  (1.94 mg) and phenylvinyl sulfoxide (1.5  $\mu\text{L}$ , 4 eq.) ii) phenylvinyl sulfoxide (1.5  $\mu\text{L}$ , 4 eq.) added to a solution of  $[\text{IrCl}(\text{COD})(\text{IMes})]$  (1.92 mg) and dibenzyl sulfoxide (3 mg) preactivated with 3-bar  $\text{H}_2$  for 90 mins iii)  $[\text{IrCl}(\text{COD})(\text{IMes})]$  (0.3 mg) and phenylvinyl sulfoxide (1.5  $\mu\text{L}$ , 25 eq.) and iv)

[IrCl(COD)(IMes)] (1.99 mg) and phenylvinyl sulfoxide (1 mL, 2400 eq.) and are shown in Figure S9. The turnovers for each condition are given in Table S5.

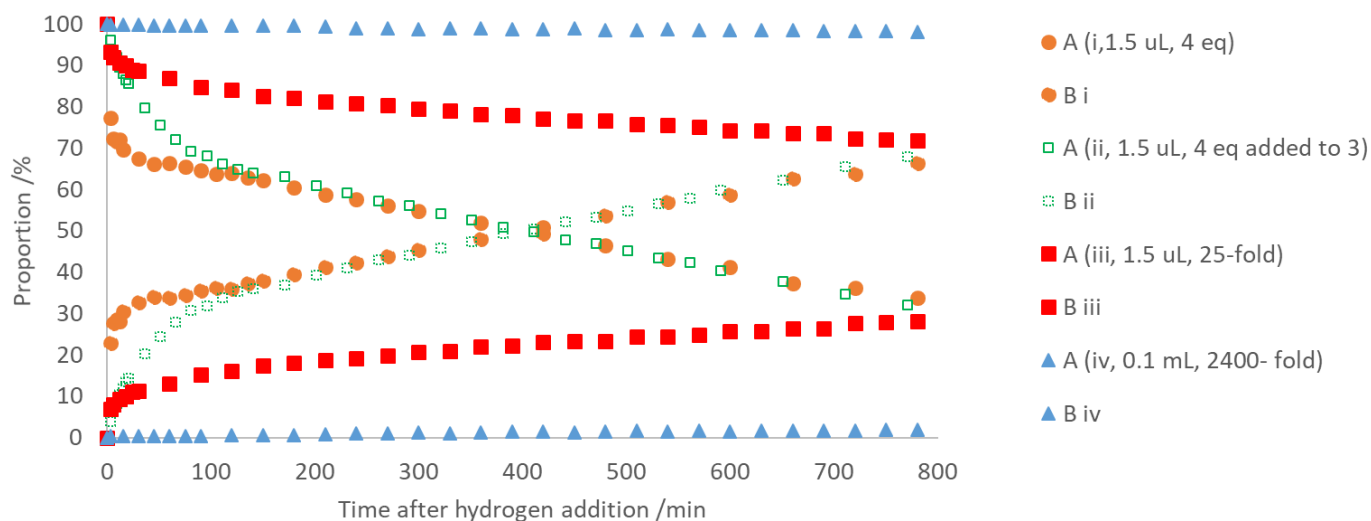

Figure S16: Results from monitoring the hydrogenation of vinyl sulfoxide in 0.6 mL methanol- $d_4$  at 298 K after 3 bar  $H_2$  addition to solutions of **1** and **A** according to conditions i-iv.

Table S5: Catalytic turnovers for the hydrogenation of **A** by **1** in the first 15, 30, 60 and 720 minutes according to conditions i-iv.

| Conditions | Turnover /s <sup>-1</sup> |                      |                      |                      | Turnover number |
|------------|---------------------------|----------------------|----------------------|----------------------|-----------------|
|            | First 15 mins             | First 30 mins        | First 1 hour         | First 12 hours       |                 |
| i          | $1.3 \times 10^{-3}$      | $6.7 \times 10^{-4}$ | $3.5 \times 10^{-4}$ | $5.5 \times 10^{-5}$ | 3               |
| ii         | $5.0 \times 10^{-4}$      | $3.7 \times 10^{-4}$ | $2.6 \times 10^{-4}$ | $5.8 \times 10^{-5}$ | 3               |
| iii        | $2.5 \times 10^{-3}$      | $1.5 \times 10^{-3}$ | $8.7 \times 10^{-4}$ | $1.5 \times 10^{-4}$ | 9               |
| iv         | $7.8 \times 10^{-4}$      | $3.2 \times 10^{-4}$ | $2.8 \times 10^{-4}$ | $9.5 \times 10^{-5}$ | 48              |

### S3.2. Formation of [IrCl(H)<sub>2</sub>(C)<sub>2</sub>(IMes)] , **3**

The formation of **3** at 245 K can be monitored by recording a series of <sup>1</sup>H NMR spectra after 3 bar  $H_2$  addition to a solution of 5 mM **1** and 4 eq. **C** in methanol- $d_4$ . The proportion of each species in solution was determined from diagnostic IMes resonances of **1**, bound  $CH_2$  sulfoxide resonances of **3**, and  $CH_2$  resonances of **C**.

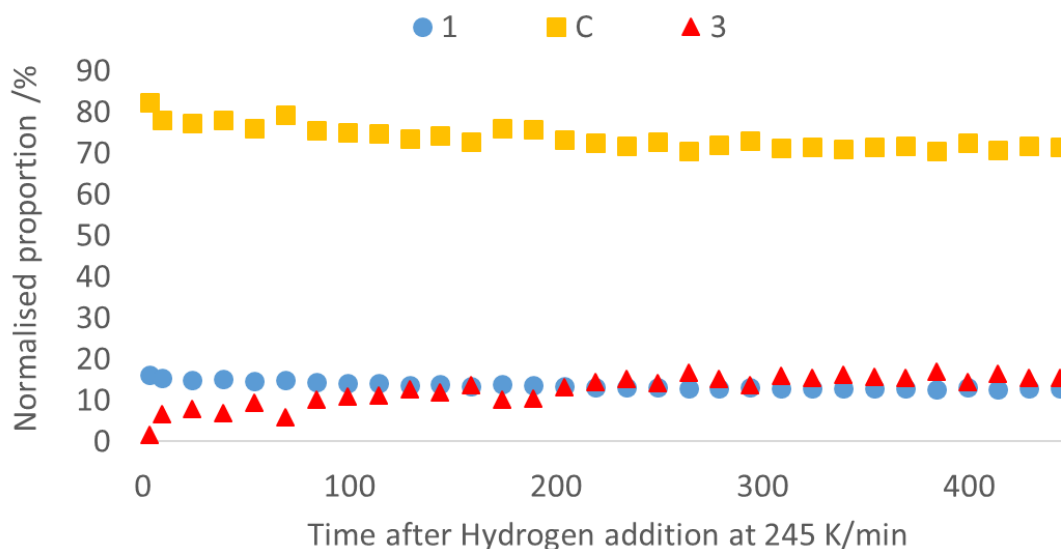

Figure S17: Results from monitoring the formation of [IrCl(H)<sub>2</sub>(C)<sub>2</sub>(IMes)] in methanol- $d_4$  at 245 K after 3 bar  $H_2$  addition to a solution of 5 mM **1** and 4 eq. **C**.

## S4. References

1. Adams, R. W.; Aguilar, J. A.; Atkinson, K. D.; Cowley, M. J.; Elliott, P. I.; Duckett, S. B.; Green, G. G.; Khazal, I. G.; López-Serrano, J.; Williamson, D. C., Reversible interactions with para-hydrogen enhance NMR sensitivity by polarization transfer. *Science* **2009**, *323* (5922), 1708-1711.
2. Vazquez-Serrano, L. D.; Owens, B. T.; Buriak, J. M., The search for new hydrogenation catalyst motifs based on N-heterocyclic carbene ligands. *Inorg. Chim. Acta* **2006**, *359* (9), 2786-2797.
3. CrysAlisPro, Oxford Diffraction Ltd., Version 1.171.34.41.
4. Dolomanov, O. V.; Bourhis, L. J.; Gildea, R. J.; Howard, J. A.; Puschmann, H., OLEX2: a complete structure solution, refinement and analysis program. *J. Appl. Cryst.* **2009**, *42* (2), 339-341.
5. Sheldrick, G., SHELXT - Integrated space-group and crystal-structure determination. *Acta Cryst. Sec. A.* **2015**, *71* (1), 3-8.
6. Sheldrick, G., Crystal structure refinement with SHELXL. *Acta Cryst. Sec. C.* **2015**, *71* (1), 3-8.
